# Supplementary material for: Stress-Reducing Function of Matcha Green Tea in Animal Experiments and Clinical Trials
Source: PubMed Central journal article supplement (PMC6213777; doi:10.3390/nu10101468), 2018-10-10
Supplement: nutrients-10-01468-s001.pdf [file nutrients-10-01468-s001.pdf]

Table s1. Components of matcha marketed in Japan (mg/g)

| No. | Theanine | Arg   | Glu   | Asp   | Asn  | Ser  | Gln  | GABA | Caffeine | EGCG  | ECG   | EGC   | EC    |
|-----|----------|-------|-------|-------|------|------|------|------|----------|-------|-------|-------|-------|
| 1   | 22.33    | 2.96  | 3.01  | 3.57  | 0.52 | 0.71 | 0.61 | 0.14 | 33.31    | 63.08 | 8.58  | 21.65 | 4.22  |
| 2   | 19.48    | 4.25  | 3.09  | 4.56  | 1.13 | 1.10 | 0.65 | 0.14 | 36.28    | 66.06 | 9.30  | 17.74 | 3.81  |
| 3   | 15.81    | 2.87  | 2.72  | 3.96  | 0.82 | 1.10 | 0.67 | 0.20 | 39.95    | 74.80 | 11.07 | 21.63 | 4.60  |
| 4   | 38.77    | 18.19 | 7.58  | 8.47  | 3.36 | 1.84 | 1.34 | 0.22 | 44.43    | 57.20 | 13.81 | 9.68  | 3.44  |
| 5   | 31.53    | 10.92 | 5.72  | 7.25  | 2.44 | 1.07 | 0.92 | 0.23 | 39.32    | 57.14 | 12.49 | 12.73 | 3.81  |
| 6   | 12.29    | 2.07  | 3.47  | 3.47  | 0.79 | 0.74 | 0.63 | 0.25 | 35.24    | 75.15 | 11.34 | 26.33 | 5.14  |
| 7   | 23.34    | 7.14  | 5.48  | 6.25  | 1.32 | 0.97 | 0.75 | 0.15 | 38.73    | 64.06 | 10.30 | 12.73 | 2.50  |
| 8   | 25.53    | 7.81  | 5.19  | 6.21  | 1.37 | 1.00 | 0.80 | 0.15 | 37.17    | 63.00 | 10.46 | 13.33 | 2.93  |
| 9   | 14.79    | 1.81  | 2.93  | 3.87  | 0.56 | 0.74 | 0.77 | 0.25 | 35.47    | 74.65 | 12.30 | 25.76 | 5.95  |
| 10  | 31.09    | 10.92 | 5.92  | 5.98  | 1.21 | 0.92 | 1.55 | 0.27 | 33.66    | 60.99 | 10.35 | 12.96 | 3.19  |
| 11  | 2.48     | 0.36  | 0.48  | 0.65  | 0.09 | 0.13 | 0.11 | 0.05 | 5.95     | 13.15 | 2.20  | 4.09  | 0.87  |
| 12  | 22.63    | 4.52  | 4.63  | 4.71  | 0.86 | 0.67 | 0.62 | 0.17 | 36.11    | 67.91 | 11.01 | 10.45 | 2.63  |
| 13  | 21.03    | 6.76  | 3.88  | 5.01  | 1.24 | 1.06 | 1.42 | 0.13 | 43.85    | 78.38 | 12.76 | 15.20 | 3.51  |
| 14  | 27.60    | 15.44 | 7.63  | 7.40  | 4.14 | 1.46 | 1.04 | 0.14 | 39.87    | 55.63 | 12.20 | 12.35 | 3.84  |
| 15  | 25.48    | 8.23  | 3.48  | 6.04  | 1.75 | 1.04 | 0.95 | 0.22 | 39.61    | 67.67 | 12.25 | 12.64 | 3.38  |
| 16  | 27.99    | 12.15 | 7.80  | 6.95  | 2.66 | 1.20 | 0.98 | 0.24 | 39.84    | 60.56 | 12.64 | 12.70 | 3.82  |
| 17  | 20.39    | 4.69  | 5.22  | 4.57  | 0.80 | 0.76 | 0.76 | 0.25 | 36.00    | 70.90 | 11.50 | 15.25 | 3.36  |
| 18  | 28.99    | 12.50 | 7.52  | 6.95  | 2.90 | 1.25 | 1.08 | 0.25 | 39.95    | 59.34 | 12.44 | 14.86 | 4.26  |
| 19  | 31.64    | 14.53 | 8.11  | 6.91  | 2.60 | 1.21 | 1.21 | 0.32 | 37.43    | 55.76 | 12.21 | 7.80  | 2.66  |
| 20  | 21.73    | 7.97  | 5.67  | 5.77  | 1.91 | 0.98 | 1.02 | 0.44 | 37.68    | 61.66 | 11.12 | 11.19 | 2.93  |
| 21  | 34.50    | 15.34 | 8.34  | 7.15  | 3.86 | 1.45 | 1.09 | 0.29 | 39.07    | 54.71 | 12.55 | 9.79  | 3.19  |
| 22  | 10.62    | 1.25  | 2.83  | 2.14  | 0.44 | 0.68 | 1.17 | 0.15 | 24.28    | 63.45 | 11.65 | 39.05 | 10.46 |
| 23  | 7.25     | 0.31  | 3.19  | 1.39  | 0.12 | 0.46 | 0.43 | 0.20 | 15.18    | 52.70 | 10.00 | 42.95 | 10.28 |
| 24  | 10.76    | 0.78  | 2.39  | 1.71  | 0.47 | 0.55 | 1.03 | 0.19 | 17.64    | 56.17 | 10.21 | 41.10 | 10.75 |
| 25  | 29.31    | 12.88 | 4.80  | 6.98  | 1.74 | 1.06 | 2.13 | 0.19 | 41.98    | 66.03 | 13.18 | 12.49 | 4.01  |
| 26  | 17.53    | 3.89  | 3.69  | 3.66  | 0.78 | 0.89 | 0.95 | 0.25 | 32.90    | 59.90 | 9.21  | 20.42 | 4.33  |
| 27  | 34.29    | 15.04 | 8.32  | 7.14  | 3.81 | 1.45 | 1.09 | 0.29 | 37.80    | 52.83 | 12.03 | 9.47  | 3.05  |
| 28  | 22.19    | 7.08  | 5.19  | 4.74  | 1.27 | 1.04 | 2.17 | 0.51 | 36.41    | 60.30 | 10.46 | 11.33 | 2.87  |
| 29  | 11.22    | 2.14  | 3.41  | 3.50  | 0.82 | 0.83 | 0.65 | 0.20 | 34.63    | 71.83 | 12.47 | 27.09 | 6.22  |
| 30  | 33.64    | 17.97 | 10.91 | 8.50  | 3.36 | 2.09 | 4.63 | 0.23 | 44.56    | 64.08 | 13.30 | 6.42  | 2.06  |
| 31  | 32.05    | 14.43 | 7.36  | 7.39  | 2.59 | 1.47 | 3.59 | 0.26 | 38.74    | 59.20 | 12.73 | 9.61  | 2.98  |
| 32  | 28.81    | 14.86 | 8.96  | 7.16  | 3.90 | 1.49 | 1.77 | 0.30 | 40.85    | 59.42 | 12.99 | 14.42 | 4.01  |
| 33  | 21.82    | 5.50  | 4.17  | 5.37  | 1.01 | 1.02 | 1.05 | 0.28 | 37.51    | 67.73 | 9.95  | 12.25 | 2.68  |
| 34  | 37.13    | 17.05 | 10.06 | 8.20  | 2.38 | 1.85 | 3.03 | 0.18 | 43.15    | 61.97 | 13.55 | 7.37  | 2.28  |
| 35  | 33.52    | 15.77 | 8.56  | 7.39  | 3.10 | 1.44 | 2.09 | 0.22 | 39.26    | 58.84 | 13.35 | 8.06  | 2.76  |
| 36  | 11.34    | 2.18  | 3.27  | 3.46  | 0.93 | 0.79 | 0.75 | 0.20 | 35.61    | 74.77 | 13.24 | 28.82 | 6.56  |
| 37  | 16.48    | 4.43  | 3.99  | 2.34  | 1.38 | 1.08 | 1.16 | 0.39 | 37.48    | 60.10 | 10.33 | 23.01 | 5.46  |
| 38  | 21.02    | 6.10  | 5.00  | 4.14  | 0.98 | 0.82 | 1.90 | 0.30 | 36.27    | 54.86 | 12.30 | 21.64 | 6.39  |
| 39  | 22.51    | 9.03  | 5.34  | 3.06  | 1.97 | 1.10 | 0.96 | 0.27 | 39.45    | 61.49 | 11.08 | 15.88 | 3.90  |
| 40  | 15.77    | 4.20  | 3.80  | 3.97  | 1.32 | 1.04 | 1.13 | 0.37 | 37.74    | 59.97 | 10.36 | 23.06 | 5.56  |
| 41  | 22.57    | 6.88  | 5.37  | 4.58  | 1.05 | 0.84 | 1.68 | 0.35 | 36.31    | 54.14 | 12.87 | 21.45 | 6.44  |
| 42  | 10.16    | 2.11  | 3.04  | 2.62  | 0.58 | 0.75 | 0.70 | 0.29 | 28.12    | 63.52 | 10.95 | 37.85 | 7.98  |
| 43  | 8.72     | 1.56  | 2.76  | 2.41  | 0.53 | 0.76 | 0.52 | 0.29 | 27.42    | 65.18 | 10.83 | 40.53 | 8.08  |
| 44  | 19.54    | 5.61  | 4.94  | 4.66  | 1.56 | 1.05 | 1.29 | 0.21 | 37.88    | 61.84 | 11.22 | 17.53 | 4.35  |
| 45  | 14.90    | 2.78  | 3.22  | 3.89  | 1.33 | 1.07 | 0.96 | 0.34 | 36.13    | 64.11 | 10.49 | 23.03 | 4.86  |
| 46  | 12.20    | 2.03  | 2.94  | 3.04  | 0.65 | 0.78 | 0.97 | 0.28 | 35.22    | 66.86 | 11.62 | 33.08 | 7.27  |
| 47  | 44.65    | 10.74 | 5.86  | 7.95  | 4.01 | 1.74 | 3.20 | 0.23 | 37.19    | 48.44 | 9.96  | 8.40  | 2.50  |
| 48  | 21.76    | 8.21  | 5.00  | 5.86  | 2.03 | 0.93 | 1.37 | 0.34 | 40.78    | 63.61 | 10.89 | 13.06 | 3.06  |
| 49  | 24.36    | 8.50  | 4.99  | 3.04  | 1.31 | 0.94 | 1.41 | 0.19 | 39.93    | 69.18 | 13.03 | 13.53 | 3.53  |
| 50  | 16.38    | 3.14  | 3.38  | 3.21  | 0.44 | 0.67 | 1.05 | 0.17 | 36.01    | 74.69 | 13.02 | 21.55 | 4.70  |
| 51  | 10.17    | 3.51  | 3.46  | 3.92  | 1.38 | 0.77 | 0.74 | 0.33 | 40.31    | 76.39 | 13.19 | 21.77 | 5.01  |
| 52  | 7.87     | 1.41  | 2.64  | 2.80  | 0.59 | 0.57 | 0.51 | 0.14 | 40.35    | 86.76 | 16.09 | 28.76 | 6.48  |
| 53  | 13.13    | 5.64  | 3.63  | 4.03  | 1.75 | 0.80 | 0.99 | 0.42 | 42.19    | 67.04 | 11.01 | 16.02 | 3.79  |
| 54  | 22.46    | 2.17  | 4.39  | 2.45  | 0.33 | 0.54 | 0.89 | 0.22 | 43.18    | 84.31 | 12.86 | 39.20 | 7.24  |
| 55  | 14.24    | 3.49  | 3.63  | 4.08  | 0.59 | 0.71 | 0.83 | 0.19 | 38.86    | 84.47 | 15.87 | 26.15 | 5.60  |
| 56  | 19.54    | 5.47  | 5.05  | 4.82  | 1.22 | 0.91 | 0.69 | 0.22 | 38.55    | 63.66 | 10.66 | 13.84 | 3.00  |
| 57  | 28.35    | 12.14 | 9.27  | 7.85  | 2.24 | 1.42 | 1.00 | 0.22 | 39.86    | 59.04 | 12.07 | 7.28  | 2.10  |
| 58  | 23.12    | 11.66 | 7.14  | 6.85  | 2.61 | 1.09 | 0.97 | 0.20 | 40.47    | 58.16 | 12.84 | 13.49 | 3.96  |
| 59  | 17.57    | 9.61  | 6.65  | 7.02  | 2.98 | 1.21 | 0.64 | 0.16 | 44.65    | 61.68 | 12.82 | 18.28 | 4.87  |
| 60  | 17.68    | 7.20  | 4.59  | 6.05  | 3.30 | 1.42 | 0.59 | 0.16 | 46.08    | 65.87 | 12.58 | 19.85 | 4.97  |
| 61  | 27.57    | 12.90 | 8.34  | 6.77  | 1.98 | 1.47 | 1.32 | 0.12 | 50.16    | 72.69 | 14.31 | 6.77  | 0.87  |
| 62  | 28.22    | 13.98 | 7.90  | 6.49  | 2.33 | 1.10 | 1.93 | 0.15 | 38.55    | 56.51 | 13.92 | 10.21 | 2.60  |
| 63  | 18.55    | 7.20  | 4.83  | 6.16  | 1.64 | 1.02 | 0.56 | 0.19 | 40.02    | 61.11 | 10.02 | 15.75 | 2.92  |
| 64  | 11.18    | 6.42  | 4.71  | 5.43  | 2.23 | 0.97 | 0.47 | 0.20 | 37.95    | 57.39 | 9.37  | 20.07 | 3.66  |
| 65  | 12.84    | 5.30  | 4.76  | 4.91  | 3.34 | 1.21 | 0.27 | 0.21 | 37.42    | 51.68 | 11.21 | 30.12 | 7.30  |
| 66  | 17.44    | 7.17  | 5.97  | 6.59  | 1.71 | 1.22 | 0.53 | 0.08 | 40.02    | 67.07 | 11.59 | 15.77 | 2.42  |
| 67  | 12.46    | 4.74  | 4.70  | 4.58  | 1.43 | 0.90 | 0.42 | 0.09 | 35.21    | 60.91 | 9.41  | 20.78 | 3.29  |
| 68  | 18.24    | 7.35  | 4.79  | 5.71  | 2.69 | 1.21 | 0.49 | 0.20 | 41.14    | 60.17 | 10.73 | 16.92 | 3.60  |
| 69  | 12.90    | 4.28  | 3.57  | 4.77  | 1.55 | 1.04 | 0.44 | 0.15 | 37.20    | 63.71 | 10.05 | 22.84 | 3.88  |
| 70  | 24.82    | 11.47 | 7.10  | 6.56  | 3.16 | 1.31 | 1.36 | 0.21 | 39.37    | 56.54 | 12.34 | 13.33 | 3.29  |
| 71  | 25.23    | 14.24 | 4.31  | 5.64  | 4.80 | 2.87 | 2.97 | 0.18 | 37.09    | 47.69 | 7.36  | 14.27 | 3.09  |
| 72  | 40.62    | 15.36 | 10.57 | 12.16 | 3.74 | 2.15 | 1.38 | 0.29 | 37.03    | 66.40 | 10.47 | 12.52 | 2.20  |
| 73  | 18.23    | 8.67  | 6.41  | 6.54  | 2.49 | 1.09 | 0.53 | 0.11 | 40.43    | 56.19 | 11.95 | 17.20 | 4.16  |
| 74  | 9.44     | 2.31  | 3.05  | 4.65  | 0.82 | 0.69 | 0.53 | 0.12 | 36.95    | 71.31 | 10.43 | 23.32 | 4.24  |
| 75  | 19.66    | 9.27  | 5.63  | 6.40  | 3.29 | 1.39 | 0.49 | 0.19 | 41.09    | 56.15 | 11.30 | 16.90 | 3.96  |
| 76  | 8.89     | 1.20  | 1.81  | 1.45  | 0.17 | 0.46 | 1.07 | 0.12 | 32.38    | 87.46 | 16.37 | 44.43 | 10.19 |

Table s2. Components in matcha marketed in abroads (mg/g)

| No. | Theanine | Arg  | Glu  | Asp  | Asn  | Ser  | Gln  | GABA | Caffeine | EGCG  | ECG   | EGC   | EC    |
|-----|----------|------|------|------|------|------|------|------|----------|-------|-------|-------|-------|
| 1   | 4.86     | 0.34 | 2.21 | 1.75 | 0.29 | 0.44 | 0.46 | 0.07 | 23.89    | 69.68 | 13.71 | 40.37 | 11.17 |
| 2   | 9.65     | 1.20 | 2.76 | 2.32 | 0.55 | 0.56 | 0.80 | 0.23 | 25.48    | 66.16 | 11.98 | 39.04 | 9.21  |
| 3   | 16.21    | 7.02 | 5.30 | 6.58 | 3.09 | 1.43 | 0.37 | 0.21 | 39.36    | 58.16 | 10.55 | 21.34 | 4.97  |
| 4   | 4.14     | 0.32 | 2.35 | 1.41 | 0.22 | 0.48 | 0.36 | 0.15 | 17.81    | 56.19 | 10.55 | 46.21 | 14.02 |
| 5   | 13.42    | 1.47 | 3.14 | 2.02 | 0.52 | 0.55 | 2.60 | 0.21 | 38.43    | 80.27 | 15.99 | 37.68 | 10.54 |
| 6   | 4.86     | 0.41 | 2.08 | 1.59 | 0.10 | 0.40 | 0.34 | 0.23 | 16.77    | 61.37 | 10.39 | 48.79 | 10.10 |
| 7   | 6.62     | 0.29 | 2.39 | 1.43 | 0.08 | 0.29 | 0.33 | 0.08 | 14.71    | 57.76 | 10.15 | 48.59 | 10.67 |
| 8   | 0.75     | 0.06 | 0.27 | 0.14 | 0.02 | 0.04 | 0.05 | 0.01 | 1.66     | 6.74  | 1.31  | 5.18  | 0.92  |
| 9   | 9.75     | 1.84 | 3.04 | 2.64 | 0.96 | 0.75 | 0.11 | 0.21 | 33.25    | 72.23 | 12.05 | 28.83 | 6.15  |
| 10  | 14.67    | 2.89 | 3.33 | 3.66 | 0.56 | 0.83 | 0.77 | 0.13 | 40.96    | 86.66 | 14.57 | 27.33 | 5.64  |
| 11  | 6.92     | 0.61 | 2.01 | 1.74 | 0.29 | 0.68 | 1.44 | 0.12 | 28.89    | 76.68 | 14.80 | 47.68 | 12.22 |
| 12  | 4.55     | 0.35 | 2.22 | 1.31 | 0.20 | 0.29 | 0.42 | 0.08 | 21.19    | 65.64 | 13.96 | 32.30 | 8.80  |
| 13  | 6.26     | 0.31 | 2.71 | 1.80 | 0.19 | 0.82 | 0.71 | 0.08 | 22.12    | 58.27 | 11.88 | 53.20 | 14.33 |
| 14  | 7.33     | 0.30 | 2.10 | 1.84 | 0.34 | 0.49 | 0.78 | 0.13 | 30.05    | 81.56 | 16.07 | 39.29 | 10.36 |
| 15  | 13.98    | 2.68 | 3.16 | 3.59 | 0.93 | 0.77 | 0.86 | 0.36 | 37.89    | 76.14 | 11.66 | 28.14 | 5.63  |
| 16  | 27.09    | 9.75 | 4.13 | 4.19 | 2.21 | 0.89 | 2.14 | 0.39 | 38.88    | 78.07 | 13.33 | 26.45 | 5.78  |
| 17  | 5.13     | 0.25 | 2.03 | 0.61 | 0.21 | 0.29 | 0.93 | 0.11 | 21.38    | 73.76 | 15.85 | 40.04 | 10.74 |
| 18  | 8.81     | 1.65 | 2.53 | 2.59 | 0.87 | 0.60 | 0.82 | 0.24 | 34.91    | 74.59 | 14.24 | 34.17 | 8.28  |
| 19  | 4.32     | 0.59 | 1.60 | 0.95 | 0.31 | 0.23 | 0.32 | 0.07 | 16.94    | 65.01 | 14.14 | 24.74 | 7.50  |
| 20  | 10.50    | 1.71 | 2.60 | 2.60 | 0.76 | 0.60 | 1.32 | 0.13 | 29.44    | 65.56 | 11.48 | 36.39 | 8.55  |
| 21  | 0.32     | 0.03 | 0.16 | 0.08 | 0.01 | 0.03 | 0.03 | 0.01 | 0.85     | 3.02  | 0.63  | 2.25  | 0.18  |
| 22  | 0.82     | 0.12 | 0.33 | 0.24 | 0.07 | 0.06 | 0.08 | 0.03 | 3.58     | 9.51  | 1.91  | 5.47  | 1.04  |
| 23  | 7.79     | 2.84 | 2.35 | 2.01 | 1.46 | 0.96 | 0.42 | 0.13 | 35.76    | 58.37 | 9.96  | 27.78 | 6.59  |
| 24  | 17.68    | 2.18 | 4.47 | 3.27 | 0.76 | 0.61 | 0.89 | 0.09 | 34.88    | 88.23 | 21.01 | 28.28 | 8.33  |
| 25  | 14.63    | 2.45 | 2.65 | 2.60 | 3.59 | 1.50 | 0.86 | 0.27 | 37.49    | 61.24 | 12.89 | 35.72 | 11.03 |
| 26  | 4.26     | 0.59 | 1.62 | 1.47 | 0.34 | 0.41 | 0.67 | 0.07 | 28.96    | 82.94 | 16.26 | 47.65 | 13.00 |
| 27  | 7.04     | 0.74 | 2.41 | 1.75 | 0.38 | 0.32 | 0.70 | 0.07 | 30.47    | 79.56 | 17.70 | 33.05 | 9.34  |
| 28  | 4.94     | 0.43 | 2.14 | 1.65 | 0.33 | 0.41 | 0.57 | 0.06 | 22.91    | 70.86 | 14.00 | 39.05 | 10.32 |
| 29  | 4.82     | 0.44 | 2.08 | 1.26 | 0.17 | 0.32 | 0.53 | 0.07 | 19.18    | 62.29 | 14.74 | 42.23 | 12.68 |
| 30  | 12.74    | 4.83 | 3.11 | 3.37 | 2.19 | 0.85 | 1.07 | 0.20 | 31.49    | 58.79 | 11.46 | 12.74 | 3.72  |
| 31  | 16.30    | 5.32 | 3.78 | 3.53 | 1.92 | 0.84 | 1.57 | 0.46 | 39.00    | 73.66 | 11.74 | 26.76 | 5.87  |
| 32  | 17.79    | 2.68 | 4.08 | 2.98 | 1.00 | 0.60 | 1.17 | 0.08 | 33.01    | 85.83 | 19.33 | 30.60 | 8.59  |
| 33  | 4.62     | 0.44 | 2.31 | 1.15 | 0.13 | 0.24 | 0.75 | 0.08 | 21.89    | 51.50 | 11.15 | 28.30 | 9.54  |
| 34  | 17.05    | 8.66 | 5.34 | 4.19 | 1.75 | 0.79 | 1.84 | 0.27 | 34.85    | 59.91 | 11.15 | 11.08 | 2.69  |
| 35  | 15.55    | 1.74 | 2.41 | 2.02 | 0.86 | 0.68 | 1.39 | 0.12 | 37.61    | 80.44 | 13.56 | 30.66 | 7.62  |
| 36  | 3.84     | 0.08 | 1.85 | 1.01 | 0.10 | 0.28 | 0.24 | 0.05 | 23.65    | 83.01 | 15.77 | 35.28 | 9.21  |
| 37  | 15.26    | 1.81 | 3.25 | 3.32 | 0.70 | 0.75 | 0.79 | 0.18 | 38.16    | 86.39 | 14.21 | 28.54 | 5.77  |
| 38  | 8.73     | 1.50 | 2.44 | 2.50 | 0.58 | 0.51 | 0.61 | 0.23 | 34.23    | 76.61 | 13.62 | 35.01 | 8.07  |
| 39  | 7.67     | 1.22 | 2.82 | 2.88 | 1.62 | 0.94 | 0.59 | 0.18 | 36.70    | 79.24 | 13.77 | 33.02 | 7.14  |
| 40  | 11.91    | 1.66 | 2.84 | 2.19 | 0.47 | 0.52 | 1.77 | 0.16 | 36.36    | 80.87 | 16.19 | 43.51 | 11.74 |
| 41  | 4.94     | 0.97 | 1.40 | 1.52 | 0.37 | 0.34 | 0.28 | 0.07 | 16.95    | 37.38 | 6.43  | 15.47 | 3.51  |
| 42  | 7.21     | 1.21 | 1.24 | 1.13 | 0.16 | 0.30 | 1.17 | 0.05 | 13.27    | 28.50 | 5.10  | 12.32 | 3.08  |
| 43  | 17.20    | 4.29 | 3.80 | 4.22 | 1.44 | 0.99 | 1.01 | 0.43 | 38.44    | 65.43 | 10.00 | 27.13 | 5.38  |
| 44  | 12.19    | 3.14 | 3.39 | 3.90 | 1.03 | 0.79 | 0.94 | 0.16 | 34.80    | 70.38 | 12.13 | 28.08 | 6.43  |
| 45  | 4.07     | 0.19 | 1.92 | 1.10 | 0.10 | 0.25 | 0.34 | 0.08 | 21.00    | 66.75 | 14.58 | 39.09 | 11.31 |
| 46  | 5.25     | 0.39 | 2.27 | 1.51 | 0.21 | 0.29 | 0.28 | 0.09 | 23.32    | 60.86 | 14.71 | 46.88 | 15.40 |
| 47  | 2.69     | 0.14 | 1.35 | 0.89 | 0.15 | 0.21 | 0.21 | 0.02 | 22.46    | 53.84 | 18.56 | 27.34 | 13.70 |
| 48  | 4.71     | 0.21 | 1.97 | 1.04 | 0.06 | 0.20 | 0.32 | 0.04 | 17.36    | 72.94 | 12.14 | 38.91 | 9.06  |
| 49  | 16.04    | 2.92 | 2.73 | 4.03 | 0.86 | 1.13 | 0.67 | 0.19 | 39.84    | 75.27 | 11.01 | 22.33 | 5.12  |
| 50  | 3.81     | 0.15 | 1.81 | 0.99 | 0.12 | 0.36 | 0.32 | 0.22 | 19.11    | 67.59 | 11.22 | 54.22 | 11.37 |
| 51  | 3.12     | 0.12 | 1.45 | 0.80 | 0.10 | 0.29 | 0.25 | 0.17 | 4.46     | 8.12  | 1.20  | 1.86  | 0.39  |
| 52  | 20.56    | 4.80 | 4.50 | 4.65 | 1.15 | 0.86 | 0.88 | 0.34 | 32.81    | 58.32 | 9.11  | 15.70 | 3.83  |
| 53  | 15.13    | 2.29 | 3.30 | 3.58 | 0.84 | 0.83 | 0.91 | 0.22 | 36.17    | 73.61 | 12.53 | 26.16 | 6.31  |
| 54  | 13.23    | 2.24 | 3.09 | 2.79 | 0.66 | 0.70 | 0.76 | 0.25 | 28.75    | 64.76 | 11.05 | 33.54 | 7.89  |
| 55  | 4.73     | 0.36 | 2.02 | 1.01 | 0.18 | 0.27 | 0.38 | 0.07 | 14.52    | 49.84 | 9.52  | 43.16 | 10.70 |
| 56  | 5.61     | 0.31 | 2.24 | 1.19 | 0.06 | 0.30 | 0.71 | 0.08 | 16.13    | 56.14 | 10.51 | 48.69 | 11.85 |
| 57  | 4.32     | 0.15 | 1.81 | 1.09 | 0.11 | 0.29 | 0.59 | 0.06 | 23.03    | 87.15 | 15.65 | 32.78 | 8.37  |
| 58  | 6.66     | 0.42 | 2.40 | 1.25 | 0.08 | 0.29 | 0.40 | 0.05 | 17.50    | 73.47 | 13.38 | 38.17 | 9.36  |
| 59  | 6.13     | 0.38 | 2.07 | 1.84 | 0.34 | 0.40 | 0.88 | 0.10 | 23.27    | 70.58 | 12.67 | 40.66 | 10.17 |
| 60  | 4.01     | 0.88 | 1.61 | 1.08 | 0.40 | 0.33 | 0.30 | 0.06 | 24.43    | 69.11 | 22.71 | 33.61 | 14.08 |
| 61  | 13.71    | 2.97 | 2.83 | 1.78 | 0.20 | 0.80 | 2.81 | 0.20 | 28.15    | 84.29 | 27.96 | 32.75 | 13.58 |
| 62  | 8.45     | 0.89 | 2.86 | 2.07 | 0.12 | 0.26 | 0.57 | 0.04 | 25.80    | 76.14 | 9.86  | 28.89 | 5.67  |
| 63  | 3.53     | 0.17 | 2.10 | 1.44 | 0.16 | 0.38 | 0.51 | 0.06 | 24.41    | 67.12 | 14.01 | 48.93 | 12.66 |
| 64  | 3.66     | 0.26 | 1.50 | 1.02 | 0.09 | 0.19 | 0.51 | 0.14 | 14.25    | 62.38 | 10.69 | 50.17 | 11.22 |
| 65  | 7.96     | 0.60 | 2.27 | 1.48 | 0.28 | 0.42 | 1.44 | 0.17 | 25.03    | 74.06 | 14.98 | 39.68 | 10.26 |
| 66  | 5.45     | 0.67 | 2.15 | 1.32 | 0.30 | 0.47 | 0.76 | 0.13 | 25.06    | 68.16 | 13.60 | 45.27 | 10.81 |
| 67  | 7.20     | 0.96 | 2.09 | 1.35 | 0.40 | 0.53 | 0.76 | 0.09 | 27.07    | 65.89 | 13.06 | 44.42 | 11.37 |
